# Supplementary material for: Predicting the speciation of ionizable antibiotic ciprofloxacin by biochars with varying carbonization degrees
Source: Royal Society of Chemistry journal article supplement (doi:10.1039/d3ra00122a), 2023-01-01
Supplement: d3ra00122a1.pdf [file d3ra00122a1.pdf]

## Supporting Information

### **Predicting the speciation of ionizable antibiotic ciprofloxacin by biochars with varying carbonization degrees**

Guowei Shi,<sup>abc</sup> Yasong Li,<sup>ab</sup> Yaci Liu,<sup>ab</sup> and Lin Wu<sup>\*abd</sup>

<sup>a</sup> Fujian Provincial Key Laboratory of Water Cycling and Eco-Geological Processes, Xiamen 361021, China

<sup>b</sup> China Geological Survey & Hebei Province Key Laboratory of Groundwater Contamination and Remediation, Institute of Hydrogeology and Environmental Geology, Chinese Academy of Geological Sciences, Shijiazhuang 050061, China

<sup>c</sup> China University of Geosciences (Beijing), Beijing 100083, China

<sup>d</sup> North China University of Water Resources and Electric Power, Zhengzhou 450046, China

\*Corresponding author:

E-mail: wulin\_shs@mail.cgs.gov.cn

Tel: +86-311-67598598

Fax: +86-311-67598661

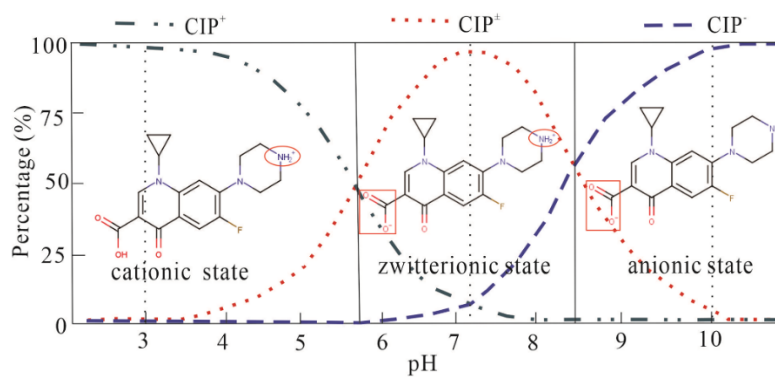

**Fig. S1** The proportion of different CIP species at various pH calculated from the MarvinSketch Software.

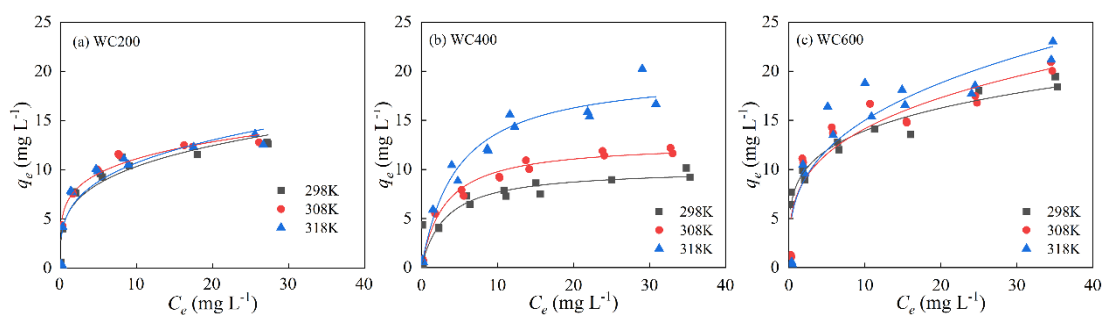

**Fig. S2** Sorption isotherms of woodchip-derived biochars at 200 °C (WC200), 400 °C (WC400) and 600 °C (WC600) for CIP at different temperatures (298-318 K).

**Table S1** Sorption isothermal parameters of woodchip-derived biochars at 200 °C (WC200), 400 °C (WC400) and 600 °C (WC600) for CIP at different temperatures (298-318 K)

| Sample | Langmuir        |                             |                             |       | Freundlich                                                    |       |       |
|--------|-----------------|-----------------------------|-----------------------------|-------|---------------------------------------------------------------|-------|-------|
|        | Temperature (K) | $q_m$ (mg·g <sup>-1</sup> ) | $K_L$ (L·mg <sup>-1</sup> ) | $R^2$ | $K_F$ (mg <sup>(1-N)</sup> ·L <sup>N</sup> ·g <sup>-1</sup> ) | $N$   | $R^2$ |
| WC200  | 298             | 12.2                        | 1.03                        | 0.958 | 5.55                                                          | 0.270 | 0.911 |
|        | 308             | 12.6                        | 1.23                        | 0.917 | 6.88                                                          | 0.208 | 0.949 |
|        | 318             | 12.9                        | 0.896                       | 0.935 | 5.58                                                          | 0.283 | 0.850 |
| WC400  | 298             | 10.1                        | 0.316                       | 0.813 | 3.74                                                          | 0.275 | 0.835 |
|        | 308             | 12.7                        | 0.327                       | 0.977 | 4.20                                                          | 0.319 | 0.945 |
|        | 318             | 20.0                        | 0.215                       | 0.952 | 5.12                                                          | 0.383 | 0.934 |
| WC600  | 298             | 19.6                        | 0.093                       | 0.950 | 3.40                                                          | 0.455 | 0.957 |
|        | 308             | 20.0                        | 0.528                       | 0.923 | 7.24                                                          | 0.288 | 0.852 |
|        | 318             | 21.9                        | 0.350                       | 0.920 | 7.08                                                          | 0.326 | 0.832 |

**Table S2** Thermodynamic parameters of CIP sorption by woodchip-derived biochars at 200 °C (WC200), 400 °C (WC400) and 600 °C (WC600) at different temperatures (298-318 K)

| Sample | Temperature (K) | $\Delta G$ (kJ·mol <sup>-1</sup> ) | $\Delta H$ (kJ·mol <sup>-1</sup> ) | $\Delta S$ (kJ·mol <sup>-1</sup> ·K <sup>-1</sup> ) |
|--------|-----------------|------------------------------------|------------------------------------|-----------------------------------------------------|
| WC200  | 298             | -1.34                              | 4.54                               | 0.0190                                              |
|        | 308             | -1.53                              |                                    |                                                     |
|        | 318             | -1.73                              |                                    |                                                     |
| WC400  | 298             | -0.377                             | 19.1                               | 0.0650                                              |
|        | 308             | -0.870                             |                                    |                                                     |
|        | 318             | -1.69                              |                                    |                                                     |
| WC600  | 298             | -0.86                              | 20.9                               | 0.0740                                              |
|        | 308             | -2.13                              |                                    |                                                     |
|        | 318             | -2.31                              |                                    |                                                     |
